# Supplementary material
Source: PubMed Central journal article supplement (PMC1266138)

1A

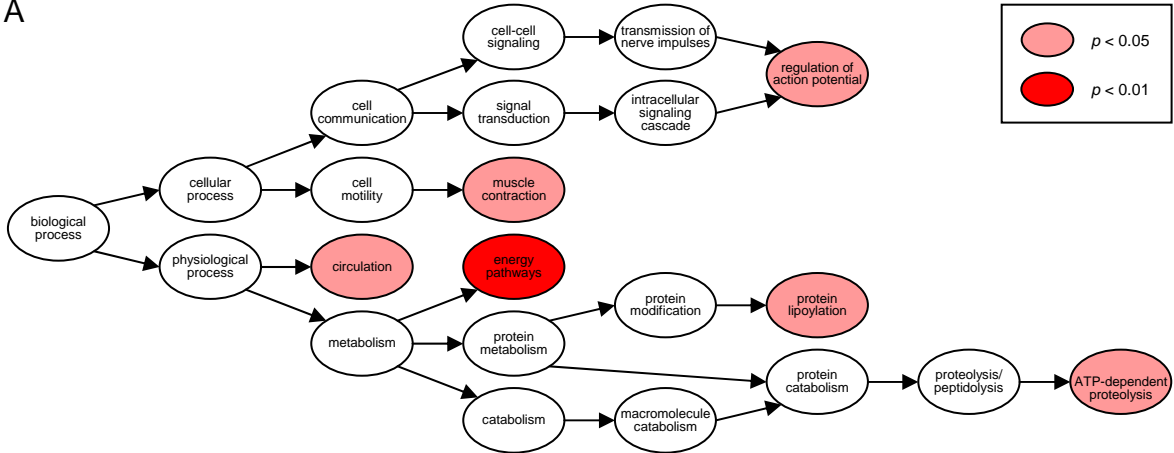

1B

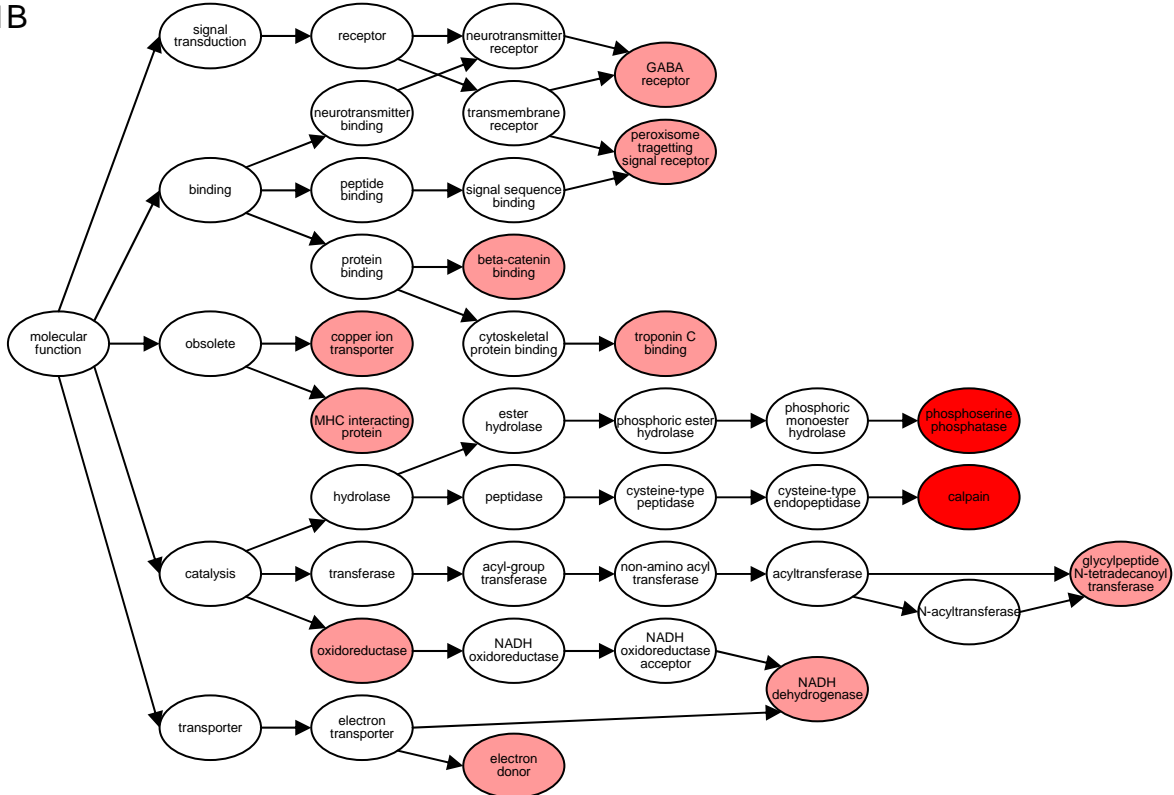

Supplement: pnas_0507666102_1.pdf [file pnas_0507666102_1.pdf]
